# Supplementary material for: An integrated screening approach for designing efficient thermally activated delayed fluorescent materials for OLEDs
Source: Royal Society of Chemistry journal article supplement (doi:10.1039/d4tc02333a), 2024-01-01
Supplement: d4tc02333a1.pdf [file d4tc02333a1.pdf]

## Supporting Information

### Table of Contents

1. Computational details
2. Machining learning model parameters
3. Data of 90 molecules selected from 1787 molecules

### Computational details

Geometry optimization and excited-state property calculations were performed using the M062X/def2SVP level of theory with the Gaussian16 software package. The calculations for excited-state properties included vertical excitation energy calculations based on optimized ground-state structures, geometry optimizations of the  $S_1$  and  $T_1$  states, and single-point energy calculations for the  $T_1$  state. Additionally, we used Multiwfn to calculate the overlap integrals of the Highest Occupied Molecular Orbital (HOMO) and Lowest Unoccupied Molecular Orbital (LUMO) orbitals.

Our approach involves extensive computational chemistry and machine learning tasks. All computational tasks are performed on servers with AMD EPYC™ 7R32 CPUs. The software versions used for computational chemistry are Gaussian 16, Multiwfn 3.7, and Python 3.8. Each TADF molecule's ground state geometry optimization and vertical excitation state calculations require approximately 300 core hours of computational resources. The geometry optimization and single-point energy calculations for the  $S_1$  and  $T_1$  excited states require approximately 2000 core hours of computational resources. For future researchers, using the M062X/def2SVP method for calculating TADF is sufficient for performing computational chemistry screening.

### Machining learning model parameters

The input of the model consists of five types of molecular fingerprints converted from SMILES, including four qualitative molecular fingerprints (Atom-pair, Daylight, Morgan, Topological) and quantitative molecular descriptors (RDKit descriptors). Standardization and Principal Component Analysis (PCA) methods were used to reduce the dimensionality of the features. Initially, the 365 data points were randomly divided into four groups, and the models were trained using grid search and 4-fold cross-validation. Four models, Gradient Boosting Decision Tree (GBDT), Random Forest (RF), K-Nearest Neighbors (KNN), and Extreme Gradient Boosting (XGBoost), were trained. Finally, using all the data for training, the models were integrated using a voting method.

The machine learning model training was conducted using Python 3.8. The training of the ensemble learning model required approximately 7200 core hours of computational resources. For the prediction of  $T_d$ , researchers can provide us with the TADF molecular structures for the prediction of molecular properties.

### Data of 90 molecules selected from 1787 molecules

**Table1**

| Number | $E_{ad}S_1$ (eV) | $E_{ad}T_1$ (eV) | $T_1$ (eV) | E(RM062X)  | $\Delta E_{ad}ST$ (eV) | $\Delta G_{RISC}$ (eV) |
|--------|------------------|------------------|------------|------------|------------------------|------------------------|
| 1      | 2.6319           | 2.4841           | 3.0232     | -2940.6311 | 0.1478                 | 0.3659                 |
| 2      | 2.4732           | 2.4026           | 2.9815     | -2479.0407 | 0.0706                 | 0.3459                 |
| 3      | 3.6152           | 2.4232           | 3.0462     | -2057.1383 | 1.192                  | 1.1920                 |
| 4      | 2.4777           | 2.5225           | 3.0586     | -3088.5204 | -0.0448                | 0.2965                 |
| 5      | 2.8301           | 2.8255           | 3.1101     | -2075.8658 | 0.0046                 | 0.1851                 |
| 6      | 2.6539           | 2.5958           | 3.1062     | -2940.6247 | 0.0581                 | 0.2977                 |
| 7      | 2.4761           | 2.3577           | 3.233      | -2479.0234 | 0.1184                 | 0.4837                 |
| 8      | 2.6665           | 2.4494           | 2.9962     | -2479.0436 | 0.2171                 | 0.4153                 |
| 9      | 2.5815           | 2.5633           | 3.0991     | -3510.4325 | 0.0182                 | 0.3088                 |
| 10     | 2.8399           | 2.848            | 3.1386     | -1909.2266 | -0.0081                | 0.1627                 |
| 11     | 2.7804           | 2.8296           | 3.1308     | -2223.3416 | -0.0492                | 0.1601                 |
| 12     | 2.8295           | 2.5796           | 3.1302     | -2057.1281 | 0.2499                 | 0.4059                 |
| 13     | 3.2682           | 2.5793           | 3.085      | -2142.4426 | 0.6889                 | 0.7200                 |
| 14     | 2.7414           | 2.1437           | 2.9052     | -2753.8707 | 0.5977                 | 0.7792                 |
| 15     | 2.5355           | 1.3988           | 2.9809     | -2135.4443 | 1.1367                 | 1.4189                 |
| 16     | 2.7194           | 2.6894           | 3.1491     | -2521.8734 | 0.03                   | 0.2634                 |
| 17     | 2.7337           | 1.7621           | 3.1727     | -2121.5819 | 0.9716                 | 1.2236                 |
| 18     | 3.1615           | 2.0104           | 3.2693     | -1798.6164 | 1.1511                 | 1.2565                 |
| 19     | 2.8128           | 2.0128           | 3.3032     | -2034.1987 | 0.8                    | 1.0188                 |
| 20     | 2.8095           | 2.0143           | 3.2119     | -1948.8668 | 0.7952                 | 0.9751                 |
| 21     | 3.1902           | 2.4864           | 3.4232     | -2199.3840 | 0.7038                 | 0.8591                 |
| 22     | 3.0315           | 2.4727           | 3.5626     | -2670.6126 | 0.5588                 | 0.7836                 |
| 23     | 2.9491           | 2.4018           | 3.5345     | -2818.0963 | 0.5473                 | 0.7354                 |
| 24     | 3.6083           | 2.71             | 3.3918     | -3852.8594 | 0.8983                 | 0.9729                 |
| 25     | 3.9077           | 2.9014           | 3.5404     | -2978.5192 | 1.0063                 | 1.0312                 |
| 26     | 2.4627           | 2.2965           | 2.985      | -2459.1519 | 0.1662                 | 0.4088                 |
| 27     | 2.5034           | 2.2952           | 2.9841     | -2782.0713 | 0.2082                 | 0.4329                 |
| 28     | 2.1231           | 2.099            | 2.7223     | -2672.4434 | 0.0241                 | 0.3060                 |
| 29     | 2.5151           | 2.3031           | 3.0683     | -2154.4057 | 0.212                  | 0.4442                 |
| 30     | 2.5238           | 2.2515           | 2.9792     | -2154.4117 | 0.2723                 | 0.4706                 |
| 31     | 2.6432           | 2.2911           | 3.0464     | -2670.1065 | 0.3521                 | 0.5350                 |
| 32     | 2.5924           | 2.541            | 2.7921     | -2971.5051 | 0.0514                 | 0.2105                 |
| 33     | 2.3101           | 2.1485           | 2.8103     | -4238.4674 | 0.1616                 | 0.4891                 |
| 34     | 2.5481           | 2.2372           | 2.9133     | -2254.2180 | 0.3109                 | 0.4901                 |
| 35     | 2.504            | 2.0726           | 2.8626     | -2168.6877 | 0.4314                 | 0.5955                 |
| 36     | 2.5524           | 2.0712           | 2.8893     | -2491.6058 | 0.4812                 | 0.6399                 |
| 37     | 2.1452           | 2.0337           | 2.6443     | -2381.9805 | 0.1115                 | 0.3385                 |
| 38     | 2.5729           | 2.0582           | 2.868      | -1863.9414 | 0.5147                 | 0.6484                 |
| 39     | 2.6353           | 2.0366           | 2.7566     | -1863.9442 | 0.5987                 | 0.6783                 |
| 40     | 2.1362           | 1.6823           | 2.5421     | -2480.1664 | 0.4539                 | 0.6458                 |
| 41     | 2.1936           | 1.6571           | 2.5165     | -2637.2311 | 0.5365                 | 0.7067                 |
| 42     | 2.0341           | 1.8337           | 2.3497     | -2173.2466 | 0.2004                 | 0.3667                 |
| 43     | 2.1579           | 1.6598           | 2.5293     | -3108.3954 | 0.4981                 | 0.7043                 |
| 44     | 2.1014           | 1.6792           | 2.4663     | -2937.7323 | 0.4222                 | 0.6024                 |
| 45     | 2.7391           | 1.9611           | 2.3919     | -2483.7492 | 0.778                  | 0.7929                 |
| 46     | 1.9068           | 0.4973           | 2.349      | -2474.4640 | 1.4095                 | 1.6129                 |
| 47     | 2.3676           | 1.6374           | 2.3889     | -2954.9115 | 0.7302                 | 0.8553                 |
| 48     | 2.1011           | 1.8163           | 2.4439     | -2167.4932 | 0.2848                 | 0.4475                 |
| 49     | 2.1553           | 1.831            | 2.4243     | -2490.4134 | 0.3243                 | 0.4636                 |
| 50     | 2.1119           | 1.7859           | 2.4104     | -2093.5421 | 0.326                  | 0.4611                 |
| 51     | 2.1481           | 1.8112           | 2.4672     | -1862.7466 | 0.3369                 | 0.4803                 |
| 52     | 1.9657           | 1.8142           | 2.3732     | -2378.4423 | 0.1515                 | 0.3547                 |
| 53     | 2.1517           | 1.7724           | 2.3574     | -1862.7484 | 0.3793                 | 0.4816                 |
| 54     | 2.2551           | 1.8033           | 2.4775     | -2378.4457 | 0.4518                 | 0.5703                 |

|    |        |        |        |            |         |        |
|----|--------|--------|--------|------------|---------|--------|
| 55 | 2.2134 | 1.7829 | 2.4026 | -1694.4515 | 0.4305  | 0.5261 |
| 56 | 2.1732 | 2.0144 | 2.627  | -2103.2229 | 0.1588  | 0.4053 |
| 57 | 2.1253 | 1.6749 | 2.5374 | -1732.5029 | 0.4504  | 0.6255 |
| 58 | 2.16   | 1.6513 | 2.5116 | -1811.0354 | 0.5087  | 0.6667 |
| 59 | 2.0753 | 1.938  | 2.5648 | -2643.9161 | 0.1373  | 0.4058 |
| 60 | 2.1282 | 2.0139 | 2.5698 | -2016.2512 | 0.1143  | 0.3503 |
| 61 | 2.0883 | 1.653  | 2.5261 | -2046.6175 | 0.4353  | 0.6320 |
| 62 | 2.071  | 1.6381 | 2.4488 | -1961.2860 | 0.4329  | 0.5990 |
| 63 | 2.1633 | 1.9274 | 2.5188 | -2534.2874 | 0.2359  | 0.4167 |
| 64 | 2.5796 | 1.9468 | 2.5838 | -3556.8303 | 0.6328  | 0.7616 |
| 65 | 2.189  | 2.0749 | 2.6041 | -3012.7422 | 0.1141  | 0.3422 |
| 66 | 2.3617 | 2.3352 | 2.7238 | -2869.3019 | 0.0265  | 0.2873 |
| 67 | 2.4252 | 2.3593 | 3.1352 | -2389.1900 | 0.0659  | 0.4171 |
| 68 | 2.1422 | 2.1678 | 2.9747 | -3455.0065 | -0.0256 | 0.4091 |
| 69 | 2.2795 | 2.2424 | 3.0786 | -2654.4863 | 0.0371  | 0.4404 |
| 70 | 2.6039 | 1.598  | 3.1738 | -2418.9160 | 1.0059  | 1.3170 |
| 71 | 2.5209 | 2.5192 | 3.2327 | -3450.3373 | 0.0017  | 0.3755 |
| 72 | 2.0251 | 1.227  | 2.1257 | -3837.0320 | 0.7981  | 0.9210 |
| 73 | 2.5609 | 2.1218 | 2.9162 | -2527.6197 | 0.4391  | 0.6137 |
| 74 | 2.3801 | 2.2213 | 2.9471 | -2127.3482 | 0.1588  | 0.4093 |
| 75 | 2.7132 | 2.1365 | 3.2155 | -2134.0164 | 0.5767  | 0.8015 |
| 76 | 2.7646 | 2.3155 | 3.0705 | -1923.0871 | 0.4491  | 0.5936 |
| 77 | 2.8043 | 2.3225 | 3.1067 | -2246.0051 | 0.4818  | 0.6275 |
| 78 | 2.4462 | 2.2504 | 2.8839 | -2136.3790 | 0.1958  | 0.3927 |
| 79 | 2.1422 | 2.1679 | 2.9747 | -3455.0065 | -0.0257 | 0.4089 |
| 80 | 2.7445 | 2.1778 | 3.0332 | -1999.3593 | 0.5667  | 0.6756 |
| 81 | 2.6039 | 1.5905 | 3.1738 | -2418.9157 | 1.0134  | 1.3253 |
| 82 | 2.4642 | 1.929  | 2.9087 | -2231.2109 | 0.5352  | 0.7633 |
| 83 | 2.4597 | 1.9063 | 2.9186 | -2554.1285 | 0.5534  | 0.7913 |
| 84 | 2.416  | 2.1145 | 2.7974 | -2444.5105 | 0.3015  | 0.4885 |
| 85 | 2.7439 | 2.6046 | 3.1989 | -2388.0814 | 0.1393  | 0.3807 |
| 86 | 2.7226 | 2.3292 | 3.4171 | -2271.9822 | 0.3934  | 0.6911 |
| 87 | 2.7096 | 2.4204 | 3.0951 | -2361.9962 | 0.2892  | 0.4986 |
| 88 | 2.9487 | 2.5001 | 3.2082 | -2877.7184 | 0.4486  | 0.6208 |
| 89 | 3.1201 | 2.4975 | 3.2165 | -2228.1833 | 0.6226  | 0.7514 |
| 90 | 2.5399 | 2.6905 | 3.1407 | -2559.1115 | -0.1506 | 0.1689 |

**Table2**

| Number | Angel (°) | $K_F(s^{-1})$ |
|--------|-----------|---------------|
| 1      | 62        | 8853806.97    |
| 2      | 61        | 16568157.94   |
| 3      | 55        | 1190576.80    |
| 4      | 48        | 13638642.39   |
| 5      | 56        | 133208.87     |
| 6      | 57        | 433811.65     |
| 7      | 54        | 3788722.10    |
| 8      | 51        | 16972426.63   |
| 9      | 58        | 2482629.87    |
| 10     | 57        | 530901.76     |
| 11     | 57        | 1593236.82    |
| 12     | 59        | 2650746.02    |
| 13     | 49        | 59745.75      |
| 14     | 75        | 21744243.13   |
| 15     | 85        | 0             |
| 16     | 50        | 2995441.77    |
| 17     | 80        | 10292308.85   |
| 18     | 53        | 1383253.67    |

---

|    |    |             |
|----|----|-------------|
| 19 | 55 | 895976.30   |
| 20 | 54 | 661893.59   |
| 21 | 70 | 59745.75    |
| 22 | 48 | 245842.01   |
| 23 | 50 | 1037296.04  |
| 24 | 48 | 58849.71    |
| 25 | 45 | 656402.14   |
| 26 | 43 | 131600.86   |
| 27 | 41 | 12181843.08 |
| 28 | 46 | 3675031.71  |
| 29 |    | 81631.09    |
| 30 | 35 | 20283406.06 |
| 31 | 47 | 2931234.56  |
| 32 | 49 | 1598921.31  |
| 33 | 61 | 13088921.29 |
| 34 | 74 | 8953939.72  |
| 35 | 68 | 1622033.08  |
| 36 | 70 | 3121360.57  |
| 37 | 48 | 4065097.39  |
| 38 | 67 | 7172832.41  |
| 39 | 49 | 20676806.12 |
| 40 | 34 | 4442209.26  |
| 41 | 34 | 76574.13    |
| 42 | 88 | 71006931.98 |
| 43 | 34 | 2251117.19  |
| 44 | 34 | 7594880.35  |
| 45 | 54 | 199013.05   |
| 46 | 58 | 979866.65   |
| 47 | 54 | 0           |
| 48 | 48 | 4014685.35  |
| 49 | 51 | 172370.43   |
| 50 | 59 | 39942.13    |
| 51 | 49 | 9268199.45  |
| 52 | 46 | 224651.81   |
| 53 | 55 | 19525051.25 |
| 54 | 56 | 5201167.74  |
| 55 | 59 | 8733268.41  |
| 56 | 51 | 4491502.61  |
| 57 | 66 | 3504783.53  |
| 58 | 65 | 7668724.05  |
| 59 | 44 | 3390175.83  |
| 60 | 46 | 4408085.54  |
| 61 | 65 | 13606376.12 |
| 62 | 67 | 519830.63   |
| 63 | 64 | 667034.70   |
| 64 | 72 | 661893.59   |
| 65 | 53 | 47975918.47 |
| 66 | 63 | 798221.30   |
| 67 | 73 | 29165.52    |
| 68 | 49 | 97808.50    |
| 69 | 86 | 0           |
| 70 | 46 | 732831.11   |
| 71 | 51 | 76156143.80 |
| 72 | 54 | 3759153.04  |
| 73 | 55 | 4480158.15  |
| 74 | 70 | 54904.28    |
| 75 | 64 | 375411.29   |

---

---

|    |    |             |
|----|----|-------------|
| 76 | 68 | 1916229.81  |
| 77 | 70 | 6409939.55  |
| 78 | 49 | 3629294.70  |
| 79 | 49 | 380762.55   |
| 80 | 38 | 20309.50    |
| 81 | 45 | 10414440.86 |
| 82 | 68 | 38335783.43 |
| 83 | 70 | 734779.70   |
| 84 | 49 | 15883670.63 |
| 85 | 69 | 34406379.54 |
| 86 | 61 | 13391927.43 |
| 87 | 89 | 347135.21   |
| 88 | 79 | 6824809.61  |
| 89 | 68 | 58849.71    |
| 90 | 49 | 62844910.73 |

---
